# Supplementary material
Source: PubMed Central journal article supplement (PMC4015618)
Supplement: ja5009272_si_001.pdf [file ja5009272_si_001.pdf]

## Supporting Information

### Dph7 catalyzes a previously unknown demethylation step in diphthamide biosynthesis

Zhewang Lin,<sup>†</sup> Xiaoyang Su,<sup>†</sup> Wei Chen,<sup>‡</sup> Bo Ci,<sup>†</sup> Sheng Zhang,<sup>‡</sup> Hening Lin<sup>\*,†</sup>

<sup>†</sup>Department of Chemistry and Chemical Biology and <sup>‡</sup>Proteomics and Mass Spectrometry Core Facility, Cornell University, Ithaca, New York, 14853

#### Method and materials

##### ***Expression and purification of yeast eEF-2***

The eEF-2 proteins from  $\Delta dph5$ ,  $\Delta dph6$  and  $\Delta dph7$  strains were expressed and purified as previously described<sup>1</sup>, with a minor modification on the method for lysing cells. Cells were lysed using a beadbeater (BioSpec Products, Inc., USA) instead of the Emulsi Flex-C3 cell disruptor.

##### ***Cloning and expression of Dph7***

Yeast YBR246W (Dph7) was amplified from yeast genomic DNA, which was extracted from BY4741 using Pierce Yeast DNA Extraction Kit. The primers used were ZL001 (5'- agtcagACTAGTATGcatcatcatcatcatcatGACTCTATTCAAGAATCAG ATG -3') and ZL002 (5'- agtcagGTCGACCTAACTATCCATGTTTGAAG -3'). The amplified gene was inserted into the p423GAL1 vector for protein production. The p423GAL1-Dph7 plasmid was transformed into BY4741 strain. Cells were grown in 2 liters of synthetic complete galactose media lacking histidine at 30°C and 200 rpm for 24 hours or till the OD600 reached 2.0. Subsequent cell harvesting and purification were the same as those for eEF-2 protein purification described above. Protein concentrations were determined by Bradford assay.

##### ***Cloning of eEF-2 with (His)<sub>6</sub> and flag tags***

DNA encoding eEF-2 with C-terminal (His)<sub>6</sub> and flag tags was amplified from plasmid p423MET25-EFT1His (from strain HL610E). The primers used were ZL010 (5'-agtcagGGATCCATGGTTGCTTTCACTGTTGACCA-3') and ZL011 (5'-agtcagCTCGAGTTActgtcatcgtcgtcctttagtcgggatgatgatgatgatgCAATTTGTCG TAATATTCTTGCC -3'). The amplified fragment was inserted into the p423 MET25 vector. The plasmid p423MET25-ETF1His&Flag was transformed into  $\Delta dph7$  strain. Expression and purification of the double tagged eEF-2 were the same as the procedures described above for purification of yeast eEF-2.

##### ***In vitro diphthine amidation and ADP-ribosylation using Rh-NAD***

The reconstitution of the amidation reaction on  $\Delta dph6$  eEF-2 was same as previously described.<sup>2</sup> Dph7 (50 nM) was used for the reconstitution of diphthamide formation on

*Δdph7* eEF-2. Detection of diphthamide formation was done by ADP-ribosylation reaction using Rh-NAD labeling as described.<sup>2</sup> The fluorescence signals were visualized using a Fisher Scientific Ultraviolet Transilluminators (Figure 2) or a Typhoon 9400 Imager (Figure 3).

#### ***Dph7 treatment of Δdph7 eEF-2 and repurification of treated eEF-2***

Flag-tagged *Δdph7* eEF2 (2 μM) was incubated with 50 nM of Dph7 at 30°C for 1 hour. The reaction mixture was then incubated with the anti-flag M2 affinity gel (SIGMA-ALDRICH, USA) for 1 hour at 4°C with gentle shaking on a platform shaker. The anti-flag resins were collected by centrifugation at 1000xg for 5 minutes and washed with TBS (50 mM Tris-HCl pH 7.4, 150 mM NaCl) three times. The flag tagged *Δdph7* eEF-2 was eluted by 100 μg/mL of FLAG peptides (SIGMA-ALDRICH, USA) in TBS.

#### ***Non-enzymatic hydrolysis of methylated diphthine to diphthine***

*Δdph7* eEF-2 and *Δdph6* eEF-2 were buffer exchanged into a buffer containing 25 mM Tris-HCl pH 9.0 and 150 mM NaCl using Amicon Ultra Centrifugal Filters (EMD Millipore, USA). Buffer exchanged eEF-2 proteins were incubated at 30°C for various time intervals. *In vitro* diphthine amidation and detection of diphthamide formation were carried out as described above using DT and Rh-NAD.

#### ***Dph7-catalyzed hydrolysis of methylated diphthine***

*Δdph7* eEF2 (2 μM) was incubated with Dph7 (50 nM) in buffer containing Tris-HCl pH 8.0 and 150 mM NaCl at 30°C for 1 hour. As a control, *Δdph7* eEF2 (2 μM) in buffer containing Tris-HCl pH 8.0 and 150 mM NaCl was incubated at 30°C for 1 hour without Dph7. Then 10 μg of both Dph7-treated and untreated *Δdph7* eEF2 samples were used for subsequent in-solution trypsin digestion and MS analysis.

#### ***Cloning and purification of Dph5***

Yeast YLR172C (Dph5) was amplified from yeast genomic DNA, which was extracted from BY4741 using Pierce Yeast DNA Extraction Kit. The primers used were XS220 (5'-agtcagGTCGACTTACTCGTCGCTGTCGCTTCT-3') and XS221 (5'-agtcagG GATCCATGCTTTATTTGATCGGACTTG-3'). The amplified gene was inserted into pET28a vector for protein production. The pET28a YLR172C plasmid was transformed into BL21 pRARE2 strain. Cells were grown in 2 liters of LB medium at 37°C and 200 rpm. It took 4-5 hours for the OD600 to reach 0.8 after inoculation with the overnight culture. Then the culturing temperature was changed to 16°C, and the protein expression was induced by 0.4 mM isopropyl-D-thiogalactoside (IPTG). Cells were harvested after incubation at 16°C for 18 hours. The purification using HisTrap column (GE Healthcare) was the same as eEF-2 protein described above. Protein concentrations were determined by Bradford assay.

#### ***In vitro reconstitution of Dph5 activity***

*Δdph5* eEF2 (2μM) was incubated with Dph5 (50 nM) and SAM (100 μM) in buffer containing Tris-HCl pH 8.0 and 150 mM NaCl at 30°C for 1 hour. As a control, *Δdph5* eEF2 (2μM) was incubated with SAM (100μM) in the same buffer at 30°C for 1 hour without Dph5. Then 10 μg of both Dph5-treated or untreated *Δdph5* eEF2 samples were used for subsequent in-solution trypsin digestion and MS analysis.

#### ***In-solution trypsin digestion of eEF-2***

The eEF2 samples (10 μg each) were denatured and reduced using 6 M urea and 10 mM dithiothreitol (DTT) in 100 μL of Tris-HCl pH 8.0 buffer at room temperature (RT) for 1 hour. Iodoacetamide (IDA, final concentration 40 mM) was added to the mixture and left at RT for 1 hour. Extra IDA was quenched by addition of 4 μL of 1 M DTT and left at RT for 1 hour. The mixture was then diluted six times by adding a solution containing 50 mM Tris-HCl pH 8.0 and 1 mM CaCl<sub>2</sub>. Then 0.5 μg of trypsin (Promega, reconstituted at 100 μg/mL) was added and the digestion was allowed to proceed at 37°C for 18 hours. The resulting solution was acidified with 10% trifluoroacetic acid to pH 2-3 and then desalted using a Sep-Pak C18 1 cc Vac Cartridge (Waters, USA). The eluted solution was lyophilized.

#### ***Protein Identification with nano LC/MS/MS Analysis***

The nano LC/MS/MS analysis was the same as previously described.<sup>1</sup> Acquired MS and MS/MS raw spectra were processed using Mascot 2.3 against Swissprot database with a taxonomy filter of *Saccharomyces Cerevisiae* and one missed cleavage site by trypsin was allowed. Mass tolerances for precursor ions were set at 10 ppm and for MS/MS were set at 100 mmu. A fixed carbamidomethyl modification on cysteine, variable modifications on methionine oxidation, deamidation of asparagine and glutamine, and variable substitutions on histidine including unmodified, ACP-modified, methylated diphthine, diphthine and diphthamide as well as the possible elimination products were specified. All MS/MS spectra of identified peptides were manually inspected and verified using Xcalibur 2.2 software.

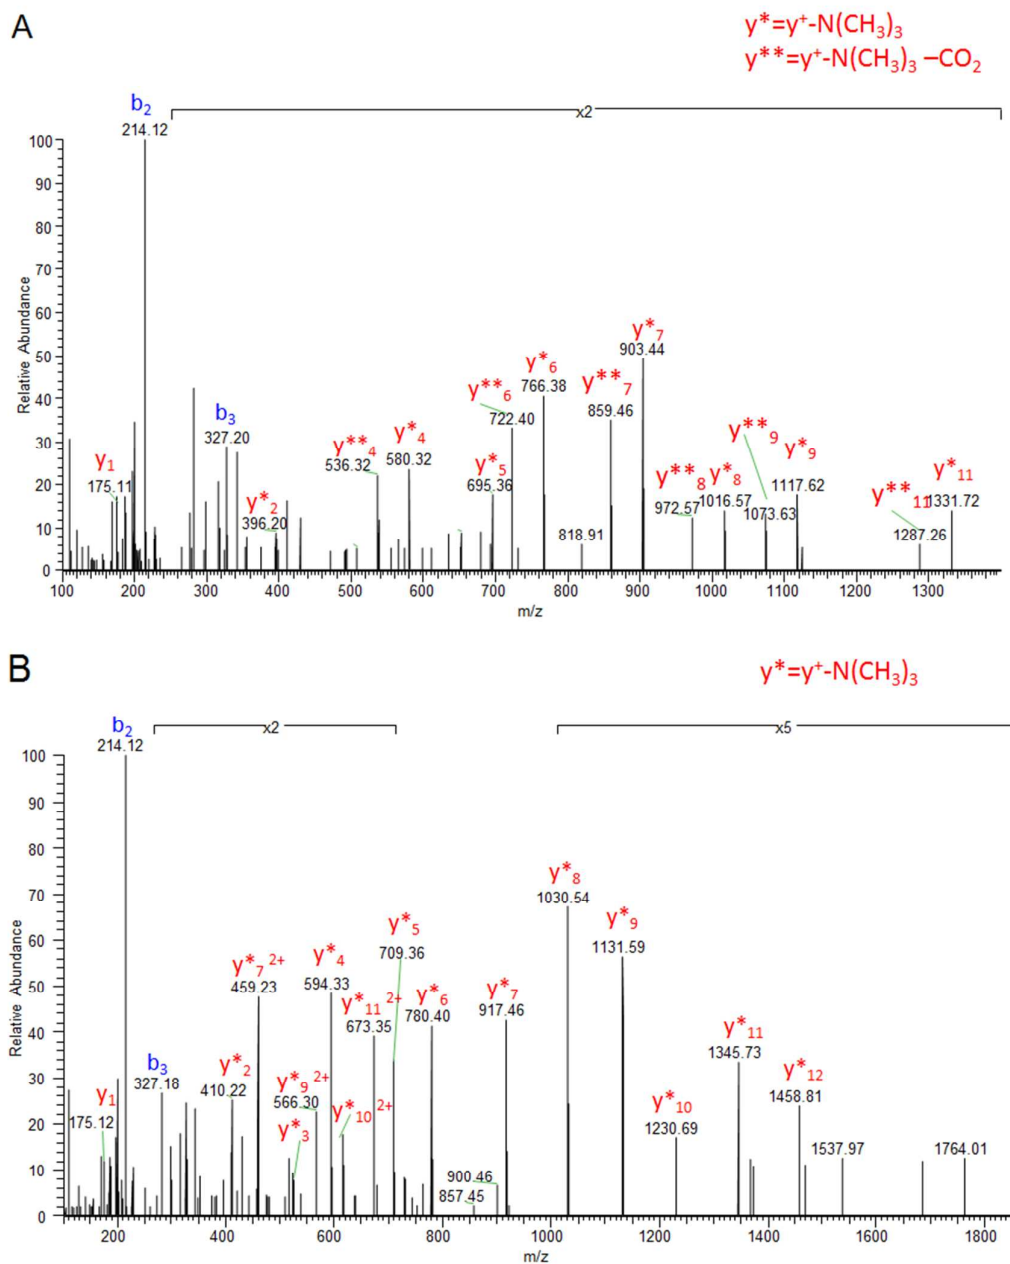

**Figure S1.** MS/MS spectra of diphthine (A, observed parental ion  $m/z$  610.6793, Calculated  $m/z$  610.6792) and methylated diphthine (B, observed parental ion  $m/z$  615.3514, Calculated  $m/z$  615.3518) containing peptides from  $\Delta dph7$  eEF-2. A neutral loss of the trimethyl amino group on each of  $y$  ion series was observed and labeled as  $y^*$ . Neutral loss of both the trimethyl amino group and carbon dioxide was observed and labeled as  $y^{**}$ .

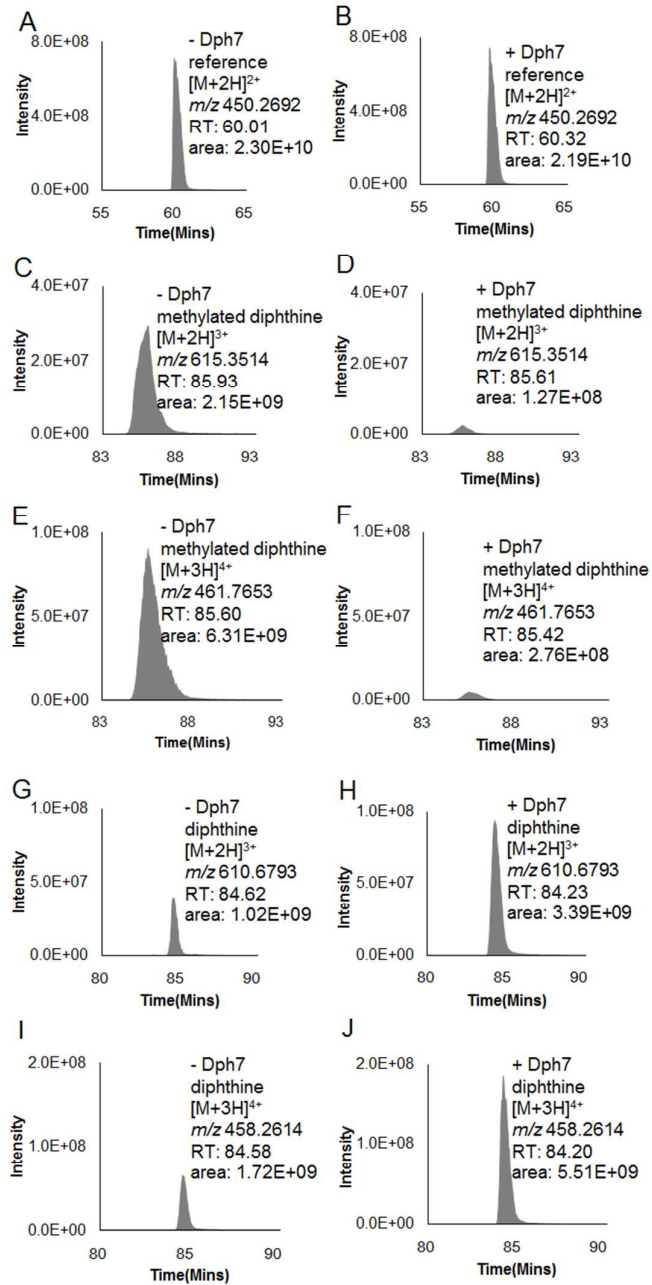

**Figure S2.** Dph7 hydrolyzes methylated diphthine to form diphthine. Relative quantification of tryptic peptides from  $\Delta$ dph7 eEF-2 with or without Dph7 treatment is shown by extracted ion chromatograms of the target ions. Peaks correspond to reference peptide $^{2+}$  (A and B, observed  $m/z$  450.2692, calculated  $m/z$  450.2691); methylated diphthine $^{3+}$  (C and D, observed  $m/z$  615.3514, calculated  $m/z$  615.3518); methylated diphthine $^{4+}$  (E and F, observed  $m/z$  461.7653, calculated  $m/z$  461.7658); diphthine $^{3+}$  (G and H, observed  $m/z$  610.6793, calculated  $m/z$  610.6792); diphthine $^{4+}$  (I and J, observed  $m/z$  458.2614, calculated  $m/z$  458.2619). “-Dph7” indicates peptides from  $\Delta$ dph7 eEF-2 without Dph7 treatment. “+Dph7” indicates peptides from  $\Delta$ dph7 eEF-2 with Dph7 treatment.

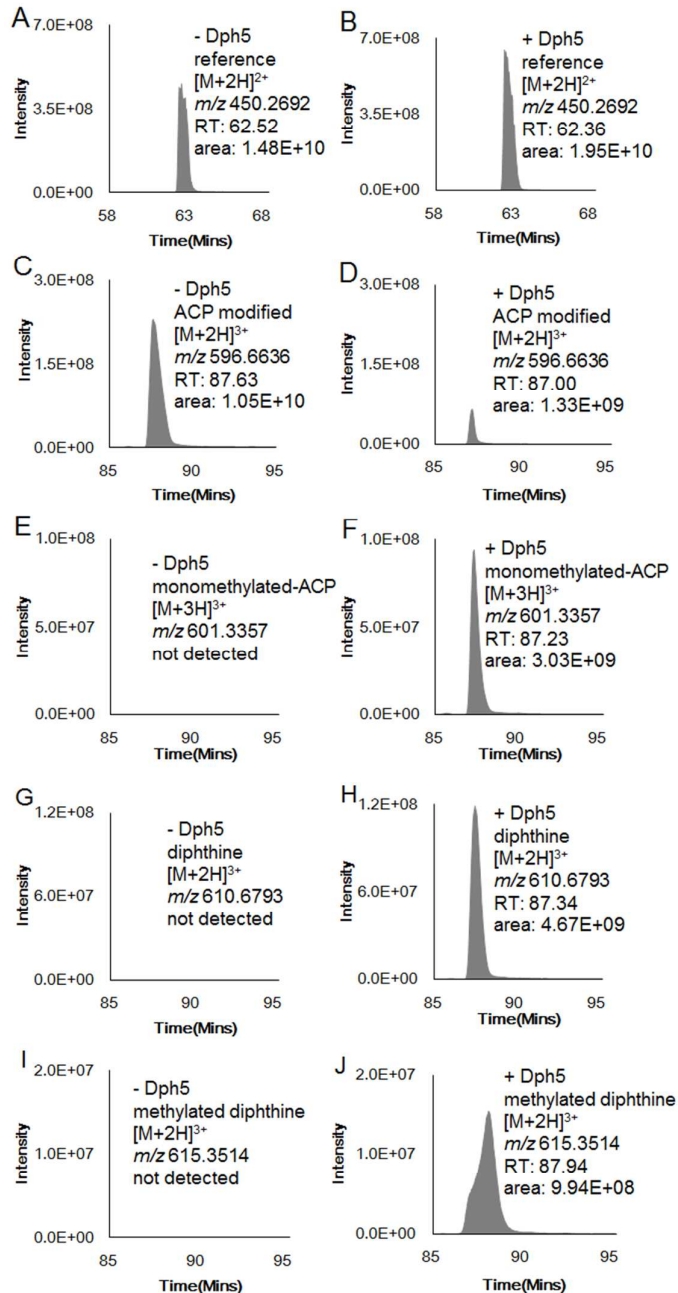

**Figure S3.** Dph5 generates methylated diphthine. Relative quantification of tryptic peptides from  $\Delta$ dph5 eEF-2 with or without Dph5 treatment is shown by extracted ion chromatograms of the target ions. Peaks correspond to reference peptide<sup>2+</sup> (A and B, observed *m/z* 450.2692, calculated *m/z* 450.2691); ACP-modified<sup>3+</sup> (C and D, observed *m/z* 596.6636, calculated *m/z* 596.6643); monomethylated-ACP<sup>3+</sup> (E and F, observed *m/z* 601.3357, calculated *m/z* 601.3361); diphthine<sup>3+</sup> (G and H, observed *m/z* 610.6793, calculated *m/z* 610.6792); methylated diphthine<sup>3+</sup> (I and J, observed *m/z* 615.3514, calculated *m/z* 615.3518). “-Dph5” indicates peptides from  $\Delta$ dph5 eEF-2 without Dph5 treatment. “+Dph5” indicates peptides from  $\Delta$ dph5 eEF-2 with Dph5 treatment.

```

...
Dph7_HoSa      LHL L M V N E T R P R L Q K V A S W Q A H Q F E A W I A A F N Y W H -- P E I V Y S G G D D G L L R G W D T R V P G - 229
Dph7_MuMu     L H L L M V N E G T A E L Q L V A S W P A H H F E A W I A A F N Y W Q -- T E L V Y S G G D D C L L R G W D T R M L G - 228
Dph7_DaNo     L H L L A V S E T G P R L Q A V A T W P A H R F E A W I A A F N Y W Q -- T E I V Y S G G D D G L L K G W D T R M A P D 144
Dph7_AnP1     L N L F S I D E S A P S V H V L N Q W K A H K F E A W I A A F N Y W N -- T D V V Y S G G D D N L L K G W D T R C S P E 173
Dph7_GaGa     L N L F S I D E S A P S V H V L N Q W E A H K F E A W I A A F N Y W N -- I D I V Y S G G D D S L L K G W D T R C N P E 100
Dph7_MaZe     I S V L S L A E G -- A L T T L S Q W K A H D F E A W I S A F S Y W D -- T Q L V Y S G G D D C K L K G W D L R I G P S 219
Dph7_BoMo     V T I L T V N G N -- G I E K R S S W R A H G F E A W I G A F N Y W N -- T N L L Y S G G D D C L F K C F D V R I Q D - 212
Dph7_ArTh     A S V V S F T D S -- N L E T V Q E W K G H D F E L W T A S F D L N N -- P N L V Y T G S D D C K F S C W D I R D S P A 198
Dph7_SaCe     Y E V Q G A T E K V I H V E S G Q F L K P H E L E C W T A E F G S L Q P F Q D V V F T G G D D S R I M A H D L R S K E F 234
                * * * * *
Dph7_HoSa      K F L F T S -- K R H T M G V C S I Q S S P H ----- R E H I L A T G S Y D E H I L L W D T R N M K Q ----- 274
Dph7_MuMu     T P V F T S -- K R H C M G V C S I Q S S P H ----- Q E H I L A T G S Y D E H V L L W D T R N I R Q ----- 273
Dph7_DaNo     M P L F T S -- E R H T M G V C S I H S S P H ----- Q E H V L A T G S Y D E H V L L W D T R H M Q Q ----- 189
Dph7_AnP1     T P V F T S -- K R H S M G V C S I Q C S P H ----- R E N L L A T G S Y D E H V L L W D T R N M K Q ----- 218
Dph7_GaGa     T P V F T S -- R R H S M G V C S I Q C S P H ----- R E N L L A T G S Y D E H V L L W D T R N M K Q ----- 145
Dph7_MaZe     S P T F I S -- K R H S M G V C S I H S N P H ----- R E H I L A T G S Y D E Q V L L W D G R N M R Q ----- 264
Dph7_BoMo     G P V A V N -- K S H E A G V T S I R S H V D ----- V E H Q L L T G S Y D E K V R L W D A R K M K S ----- 257
Dph7_ArTh     D N R V F Q N S K V H T M G V C C I S S N P S ----- D P Y S I F T G S Y D E T L R V W D T R S V S R ----- 245
Dph7_SaCe     I W S N N R --- I H D A G V V S I K C S Q P N F R N N K P T S I I T G S Y D D N I R S L D L R M M G E S I F P G A N V 291
                * * * * *
Dph7_HoSa      - P L A D T P V Q G G -- V W R I K W H P F H H ----- H L L L A A C M H S G F K I L N C Q K A M E E -- R Q E A 322
Dph7_MuMu     - P L A D V P V Q G G -- V W R L K W H P V H H ----- H L L L A A C M H N G F K I L N C Q K A I E E -- K Q D I 321
Dph7_DaNo     - P F A D A H V Q G G -- V W R L K W H P F H R ----- H L L L A A C M H N G F K I L S C H K S E --- K Q E V 235
Dph7_AnP1     - P L A D T H V E G G -- V W R L K W H P T C D ----- F V L L A A C M Q S G F K I L D C R G S M A E N M E E C 267
Dph7_GaGa     - P L A D T H V E G G -- V W R L K W H P T C D ----- F V L L A A C M Q S G F K I L D C R G S M A E N T E E C 194
Dph7_MaZe     - P L S E T P L G G G -- V W R L K W H P S H Q ----- H L L L A A C M H N D F H I L H C Q Q A L E G S A G A C 313
Dph7_BoMo     - C I T E T C V N G G -- V W R L K W H P I T P ----- N V V L A A C M Y G G F R I L H I D D G V N ----- 300
Dph7_ArTh     - P L N E T S V S L G G G V W R I K H H P S L S ----- G V V L A A C M H N G F A L A K V S D G K G E ----- 291
Dph7_SaCe     P T V N K L A C D L G G G V W R F V E S P I D Q E S H H N G S D R L L V C C M Y N G A K V V T M N D N S D E --- Y F Q 349
                * * * * *
Dph7_HoSa      T V L T S H T L P D S L V Y G A D W S W L L F R ----- S L Q R A P S W S F P S N L G -- T K T A D 366
Dph7_MuMu     T V L T S H E M P N S L V Y G A D W S W L F H S ----- M K P T P T W F F D Q N D M G -- V K A A D 365
Dph7_DaNo     N I V S S F M W H N S L A Y G A D W S W F S L R ----- P L Q A Q Q P A S F T S S L H S D T G V S N 281
Dph7_AnP1     I I L S S Y V L H N S L A Y G A D W S R L C P R D S L S A A Q D S A A T Y Q S L G E L V A R P E E G D E R L N L Q V R N 327
Dph7_GaGa     V I L S S Y V L H N S L A Y G A D W S R L C P R D S L A A L Q D S A A V C Q P L E Q P V A R S E E G D E R L N L Q V R N 254
Dph7_MaZe     P I V T S Y I L H S S L A Y G A D W S R L S L E D ----- H T A C S P P A T E P K E S P A E N R G H 359
Dph7_BoMo     - V V S E Y L E H C S I A Y G A D W C ----- 318
Dph7_ArTh     - V L E S Y N K H H S L A Y G A D W Y R G K D Q ----- 314
Dph7_SaCe     I Q H Y L K K G H D S M C Y G G D W S ----- 368
                * * * * *
...
Dph7_HoSa      ----- Q A T A A T T R D C G V N P E E A D S A F S L L A T C S F Y D H A L H L W E W E G N -- 452
Dph7_MuMu     ----- S S S S V K T R D L S H C S G G Q S F D N S L L A T C S F Y D H V L H L W K W E T N Q A 461
Dph7_DaNo     ----- L A P G S K I F D H L H V D G A N F E N C V L A T C S F Y D H V L H L W K W E M S -- 376
Dph7_AnP1     -- P E S V G S S D P G V K R P N R M S L D R S D D --- S A S P K E M S I V A T C S F Y D N I L H V W K W E M S L A 439
Dph7_GaGa     D S S K S A S S C D L G V K R S N G I G Q D G S G D S V R S S D S P K A T S I V A T C S F Y D N I L H I W K W E M N L A 374
Dph7_MaZe     ----- D E D A P S L S C L L A S C S F Y D H M L H V W R W D W M P D 433
Dph7_BoMo     ----- H G R D L V A T C S F Y D R S L H L S E I Q L N L D 344
Dph7_ArTh     ----- K Q S V V A T C S F Y D R L L R V W M P I T D F S 339
Dph7_SaCe     ----- N S L I A T C S F Y D N S L Q T W I V ----- 387
                * * * * *
...

```

**Figure S4.** Representative sequences from multiple alignments of Dph7 orthologs using CLUSTAL W<sup>3</sup> showing conserved residues. The protein sequences were obtained from the NCBI protein database: Dph7\_HoSa, Homo sapiens Dph7 (GI:24308452); Dph7\_MuMu, Mus musculus Dph7 (GI:21313066); Dph7\_DaNo, Dasypus novemcinctus Dph7 (GI:488589513); Dph7\_AnPl, Anas platyrhynchos Dph7 (GI:514780369); Dph7\_GaGa, Gallus gallus Dph7 (GI:513212019); Dph7\_MaZe, Maylandia zebra Dph7 (GI:499047390); Dph7\_BoMo, Bombyx mori Dph7 (GI:512887870); Dph7\_ArTh, Arabidopsis thaliana Dph7 (GI:15242588); Dph7\_SaCe, Saccharomyces cerevisiae Dph7 (GI:6319723).

**Table S1 Yeast strains used**

| Strain  | Genotype                                          | Source                              |
|---------|---------------------------------------------------|-------------------------------------|
| HL813Y  | <i>MATa his3Δ1 leu2Δ0 met15Δ0 ura3Δ0</i>          | Open Biosystems (YSC1048)           |
| HL814Y  | <i>MATa his3Δ1 leu2Δ0 met15Δ0 ura3Δ0 ybr246wΔ</i> | Open Biosystems<br>(YSC1021-552106) |
| HL824Y  | HL814Y [p423MET25-EFT1-Histag]                    | [1]                                 |
| HL968Y  | HL941Y [p423MET25-EFT1-Histag]                    | [1]                                 |
| HL1026Y | HL1025Y [p423MET25-EFT1-Histag]                   | [2]                                 |
| HL1105Y | HL813Y [p423GAL1-Dph7-Histag]                     | This study                          |
| HL1215Y | HL814Y [p423MET25-EFT1-His&Flagtag]               | This study                          |

**References**

- 1) Su, X.; Chen, W.; Lee, W.; Jiang, H.; Zhang, S.; Lin, H. *J. Am. Chem. Soc.* **2012**, 134, 773-6.
- 2) Su, X.; Lin, Z.; Chen, W.; Jiang, H.; Zhang, S.; Lin, H. *Proc. Natl. Acad. Sci. USA* **2012**, 109, 19983-7.
- 3) Thompson, J. D.; Higgins, D. G.; Gibson, T. J. *Nucleic Acids Res.* **1994**, 22, 4673-80.
